# Supplementary material
Source: ML conference proceedings conference paper supplement (https://openaccess.thecvf.com/content/CVPR2021/html/Liao_4D_Hyperspectral_Photoacoustic_CVPR_2021_paper.html)
Supplement: Supplementary file 1 [file Liao_4D_Hyperspectral_Photoacoustic_CVPR_2021_supplemental.pdf]

# 4D Hyperspectral Photoacoustic Data Restoration with Reliability Analysis: Supplementary Materials

Weihsang Liao<sup>1,2</sup>, Art Subpa-asa<sup>2</sup>, Yinqiang Zheng<sup>3</sup>, Imari Sato<sup>1,2,3</sup>

<sup>1</sup>Tokyo Institute of Technology, <sup>2</sup>National Institute of Informatics, <sup>3</sup>The University of Tokyo

liao.w.ac@m.titech.ac.jp, art@nii.ac.jp, yqzheng@ai.u-tokyo.ac.jp, imarik@nii.ac.jp

## 1. Abstract

In the supplementary materials, we will provide the visualization of the entire HSPA dataset, as we mentioned in section 5.1 in the main submission. We also compare the full error metrics for reference data, as we mentioned in section 5.2. Finally, we will show the visualization for restoration results on 'Tube' and 'Banana', as well as extra experiment results on other portions of 'Hand', as we mentioned in section 5.3.1.

## 2. HSPA data visualization

Our 4D HSPA dataset includes 'Leaf', 'Tube', and 'Banana'. For Leaf and Banana, we uniformly measured 9 bands ranging from 420 nm to 580 nm. For Tube, we uniformly measured 11 bands ranging from 500 nm to 700 nm. The entire HSPA data are shown in Figs. 1, 2, and 3.

## 3. Error metrics for reference data

We examined the validity of noise-removed full-grid reference data by capturing an opaque plane with five different orientations. We calculated the sum of squares errors (SSE) of the points on the plane for each orientation:

$$\begin{aligned} SSE_{noisy} &= \sum_{x,y} (z_n - z_{gt})^2, \\ SSE_{ref} &= \sum_{x,y} (z_r - z_{gt})^2, \end{aligned} \tag{1}$$

where  $(x, y, z)_{gt}$  is the ground-truth surface locations,  $(x, y, z)_n$  and  $(x, y, z)_r$  are the locations of maximum intensity points from the noisy observation and our reference data, respectively. The comparison of SSE results are given in Table 1.

Table 1. SSE comparison for noisy and reference data.

| plane equation             | inclination | $SSE_{noisy}$ | $SSE_{ref}$ |
|----------------------------|-------------|---------------|-------------|
| $0.59x + 0.13y + 0.02 = z$ | 39.12°      | 75.02         | 1.11        |
| $0.84x + 0.12y + 0.02 = z$ | 50.93°      | 172.10        | 3.13        |
| $0.76x + 0.19y + 0.01 = z$ | 47.73°      | 241.01        | 5.57        |
| $0.44x + 0.06y + 0.01 = z$ | 29.53°      | 95.32         | 1.40        |
| $0.68x + 0.05y + 0.01 = z$ | 43.10°      | 141.26        | 2.40        |

## 4. Extra experiment results

We visualize the restoration results of 'Tube' and 'Banana' in Fig. 4. We further evaluate the restoration quality on other portions of 'Hand' data. The visualization of restoration results are shown in Fig. 5. The comparison of quantitative metrics (PSNR and SSIM) for different methods are listed in Table 2.

In addition, we provide 3D visualization of the original data and restoration results in the supplemental video.

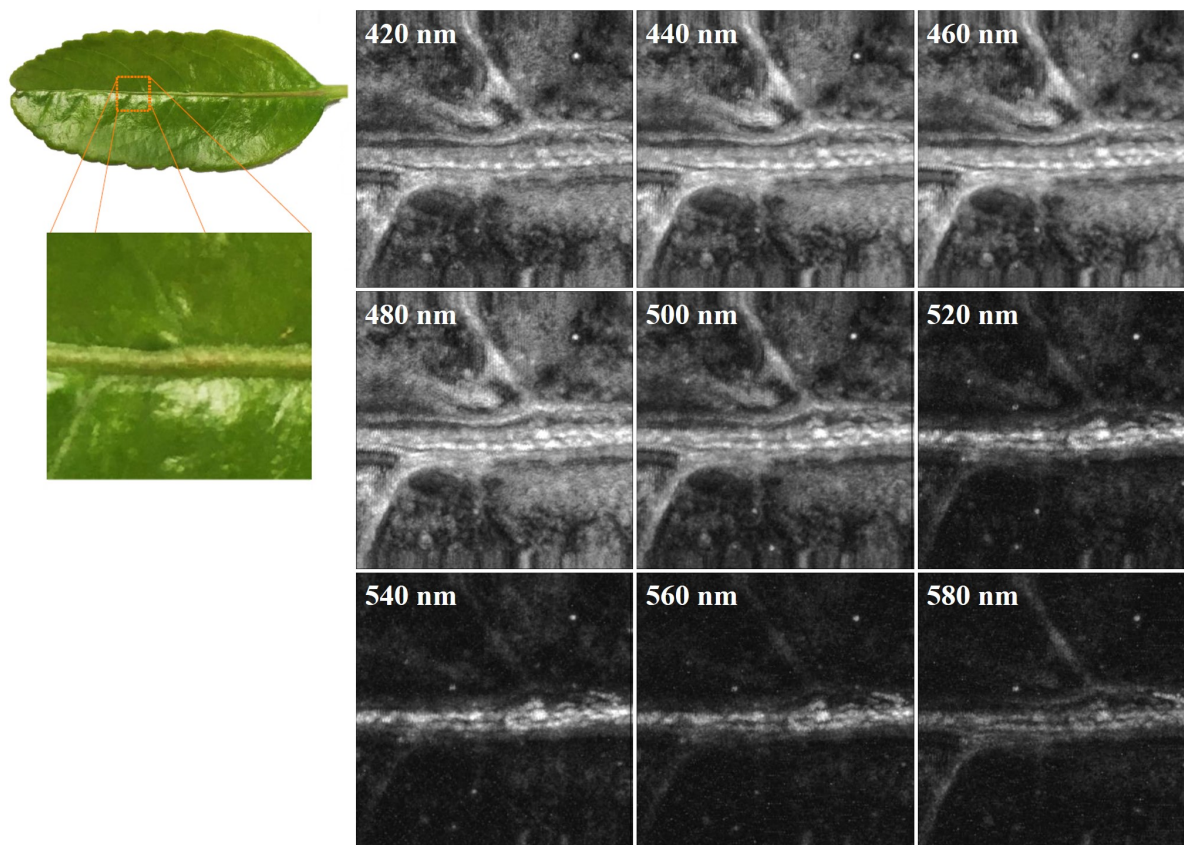

Figure 1. The visualization of Leaf data for each spectral band.

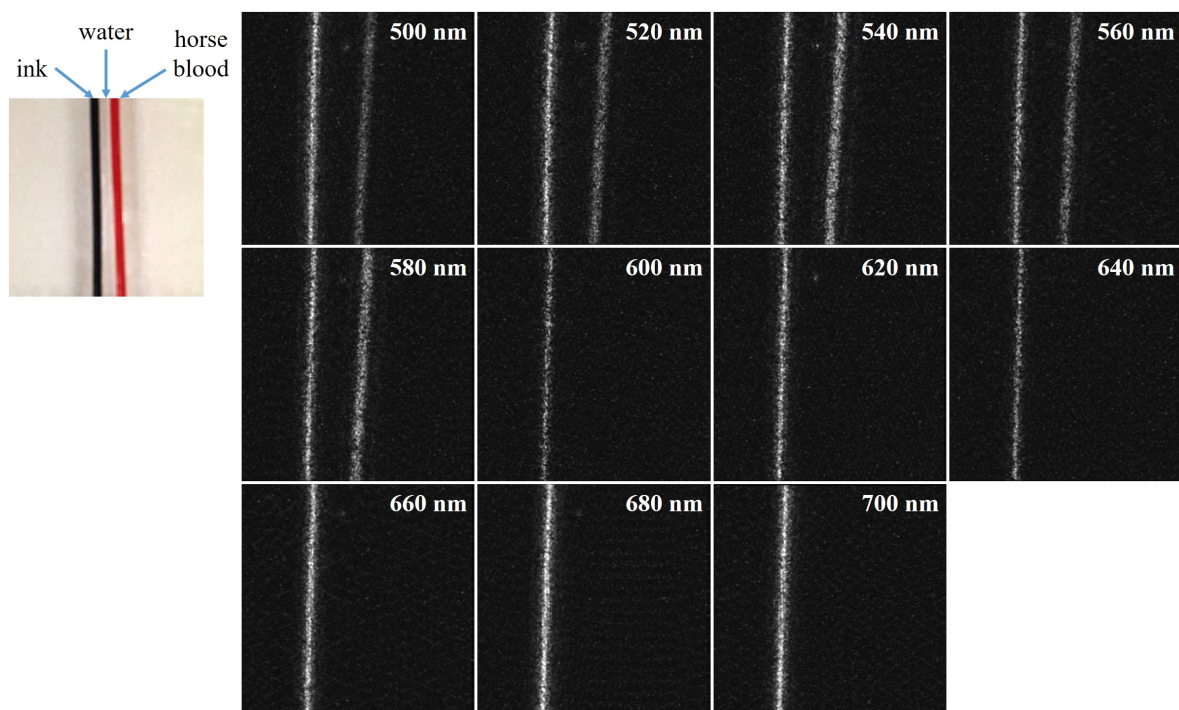

Figure 2. The visualization of Tube data for each spectral band.

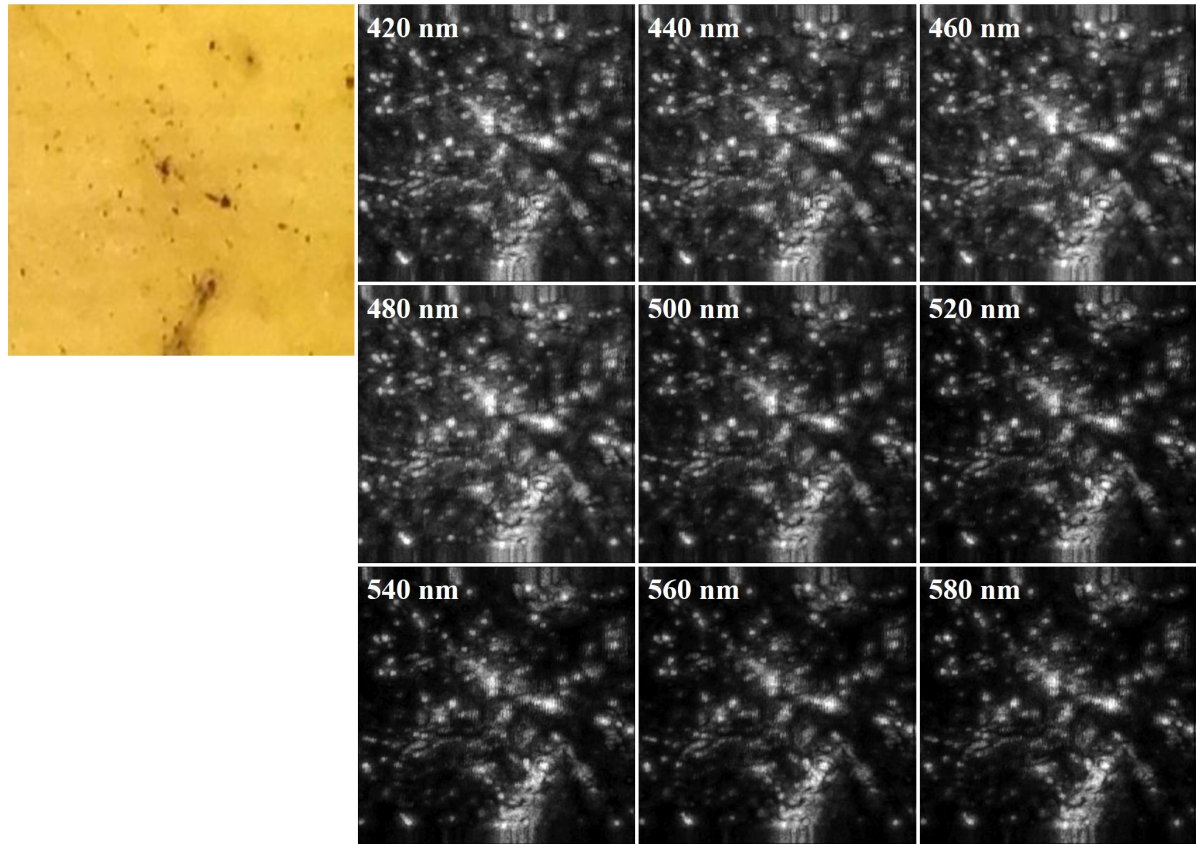

Figure 3. The visualization of Banana data for each spectral band.

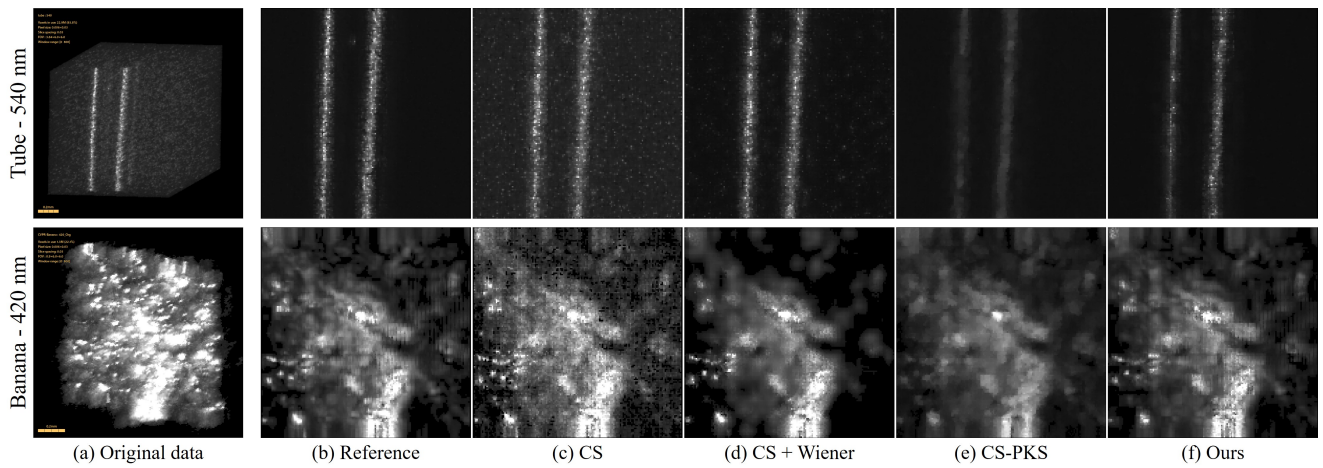

Figure 4. The visualization of restoration results by different methods on 50% sampled data (Tube and Banana).

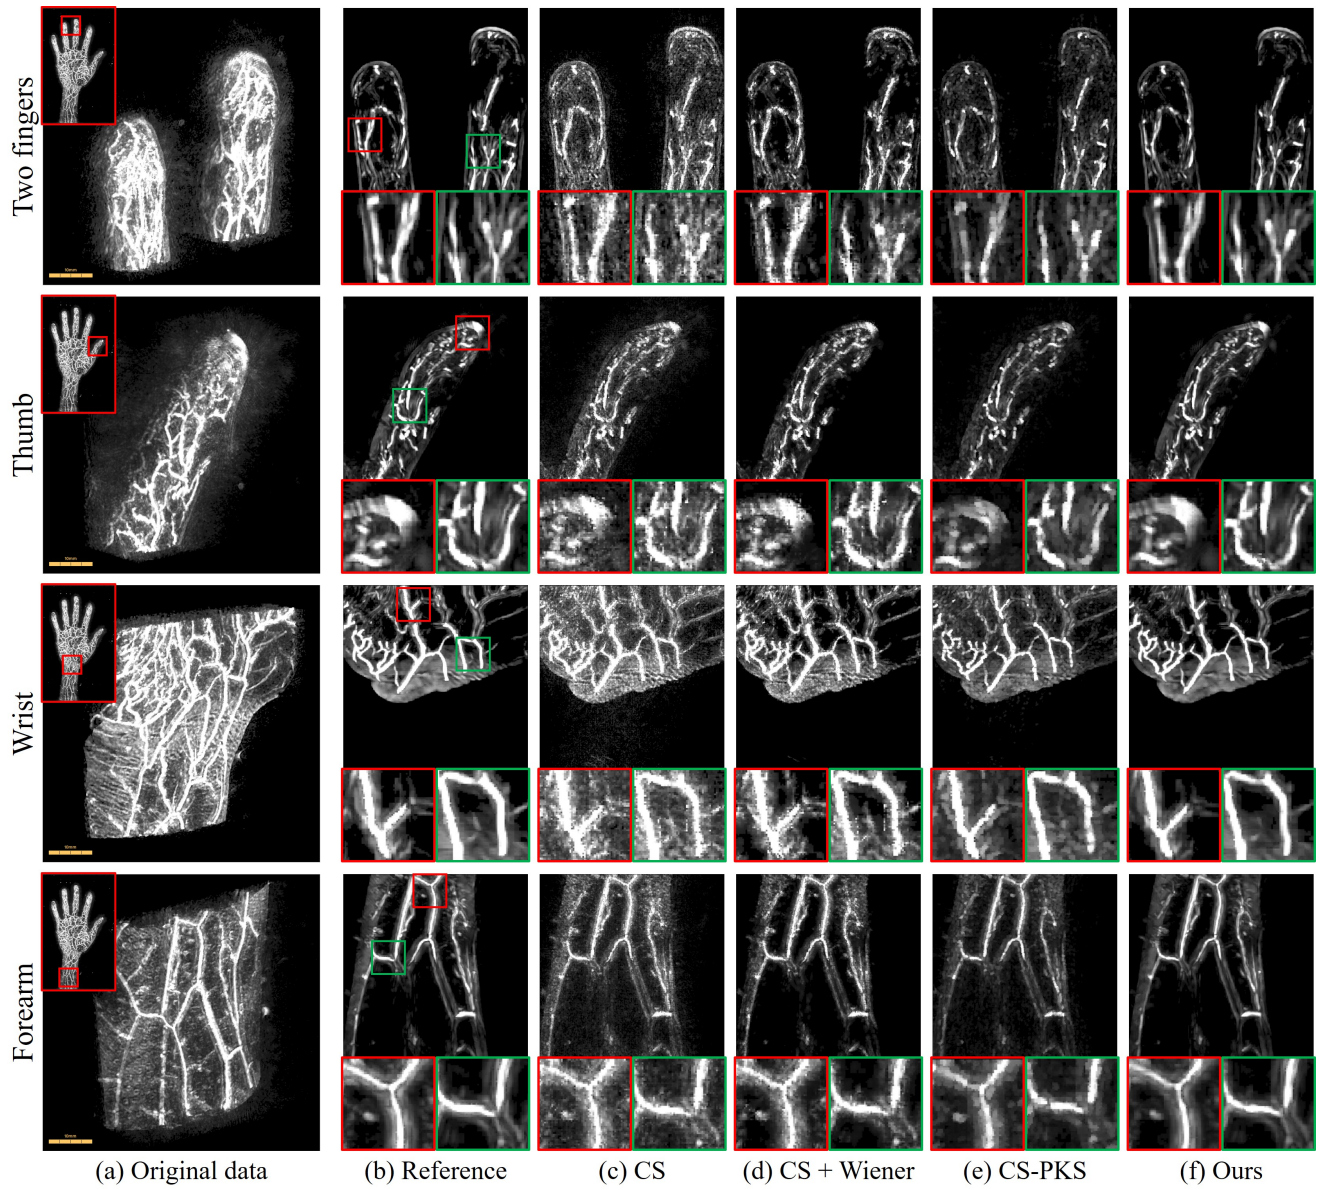

Figure 5. The visualization of restoration results by different methods on 50% sampled data (different portions of Hand).

Table 2. The quantitative results for different methods

| Sample Ratio | Method           | Two fingers  |               | Thumb        |               | Wrist        |               | Forearm      |               |
|--------------|------------------|--------------|---------------|--------------|---------------|--------------|---------------|--------------|---------------|
|              |                  | PSNR         | SSIM          | PSNR         | SSIM          | PSNR         | SSIM          | PSNR         | SSIM          |
| 0.7          | default CS       | 38.91        | 0.2341        | 39.07        | 0.1917        | 36.78        | 0.3570        | 36.39        | 0.2523        |
|              | CS + Wiener      | 41.18        | 0.2604        | 41.62        | 0.2169        | 39.70        | 0.4226        | 39.25        | 0.2885        |
|              | CS + BM4D        | 42.19        | 0.2764        | 42.08        | 0.2213        | 40.17        | 0.4372        | 39.36        | 0.2935        |
|              | CS-PKS           | 41.30        | 0.2706        | 42.20        | 0.2273        | 39.46        | 0.4347        | 39.50        | 0.2981        |
|              | SMF-LRTC         | 39.35        | 0.2387        | 39.45        | 0.1948        | 37.10        | 0.3595        | 36.76        | 0.2566        |
|              | Ours w/o reliab. | 44.52        | 0.3173        | 45.80        | 0.2801        | 42.87        | 0.5096        | 44.82        | 0.4238        |
|              | Ours w/ reliab.  | <b>54.58</b> | <b>0.9518</b> | <b>57.98</b> | <b>0.9652</b> | <b>53.26</b> | <b>0.9681</b> | <b>55.58</b> | <b>0.9806</b> |
| 0.5          | default CS       | 38.79        | 0.2295        | 39.29        | 0.1886        | 36.70        | 0.3550        | 36.53        | 0.2495        |
|              | CS + Wiener      | 40.63        | 0.2566        | 41.57        | 0.2143        | 39.07        | 0.4212        | 39.03        | 0.2859        |
|              | CS + BM4D        | 41.85        | 0.2804        | 42.32        | 0.2236        | 39.85        | 0.4438        | 39.61        | 0.2988        |
|              | CS-PKS           | 40.47        | 0.2601        | 42.03        | 0.2198        | 38.76        | 0.4272        | 39.32        | 0.2938        |
|              | SMF-LRTC         | 39.78        | 0.2409        | 39.97        | 0.1966        | 37.44        | 0.3613        | 37.27        | 0.2591        |
|              | Ours w/o reliab. | 44.20        | 0.3263        | 46.04        | 0.2860        | 42.84        | 0.5269        | 44.83        | 0.4591        |
|              | Ours w/ reliab.  | <b>47.93</b> | <b>0.8267</b> | <b>51.07</b> | <b>0.8798</b> | <b>46.62</b> | <b>0.8911</b> | <b>48.48</b> | <b>0.9275</b> |
| 0.3          | default CS       | 37.78        | 0.2050        | 39.01        | 0.1693        | 35.74        | 0.3283        | 36.09        | 0.2278        |
|              | CS + Wiener      | 38.95        | 0.2342        | 40.68        | 0.1953        | 37.15        | 0.3953        | 37.82        | 0.2630        |
|              | CS + BM4D        | 39.79        | 0.2657        | 41.39        | 0.2113        | 37.83        | 0.4233        | 38.57        | 0.2864        |
|              | CS-PKS           | 38.16        | 0.2029        | 40.36        | 0.1732        | 36.27        | 0.3389        | 37.49        | 0.2409        |
|              | SMF-LRTC         | 40.02        | 0.2392        | 40.53        | 0.1959        | 37.55        | 0.3555        | 37.74        | 0.2587        |
|              | Ours w/o reliab. | 41.86        | 0.3336        | 44.47        | 0.2853        | 40.27        | 0.5351        | <b>42.33</b> | 0.5254        |
|              | Ours w/ reliab.  | <b>42.26</b> | <b>0.5794</b> | <b>45.05</b> | <b>0.7108</b> | <b>40.49</b> | <b>0.6881</b> | 42.29        | <b>0.7767</b> |
